# Supplementary material
Source: Springer Nature journal article supplement (https://www.springermedizin.de/resource/supplementary/12889_2009_1718_MOESM1_ESM.pdf/9503812)

**psychiatric/medical treatment**

medication side-effects  
neglect of physical symptoms  
lack of compliance

**lifestyle/health behaviour**

tobacco consumption  
nutrition  
physical inactivity  
alcohol/illicit drugs  
lack of personal hygiene

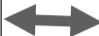

**environmental conditions**

housing conditions  
economic situation  
institutional characteristics  
social situation

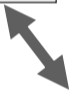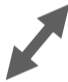

Supplement: MOESM1 [file 9503812]
